# Supplementary material for: Preclinical Evaluation of the Novel Small-Molecule MSI-N1014 for Treating Drug-Resistant Colon Cancer via the LGR5/β-catenin/miR-142-3p Network and Reducing Cancer-Associated Fibroblast Transformation
Source: MDPI journal article supplement (doi:10.3390/cancers12061590), 2020-06-16

Western Blot Raw data

Figure S1 (2E) Raw WB data

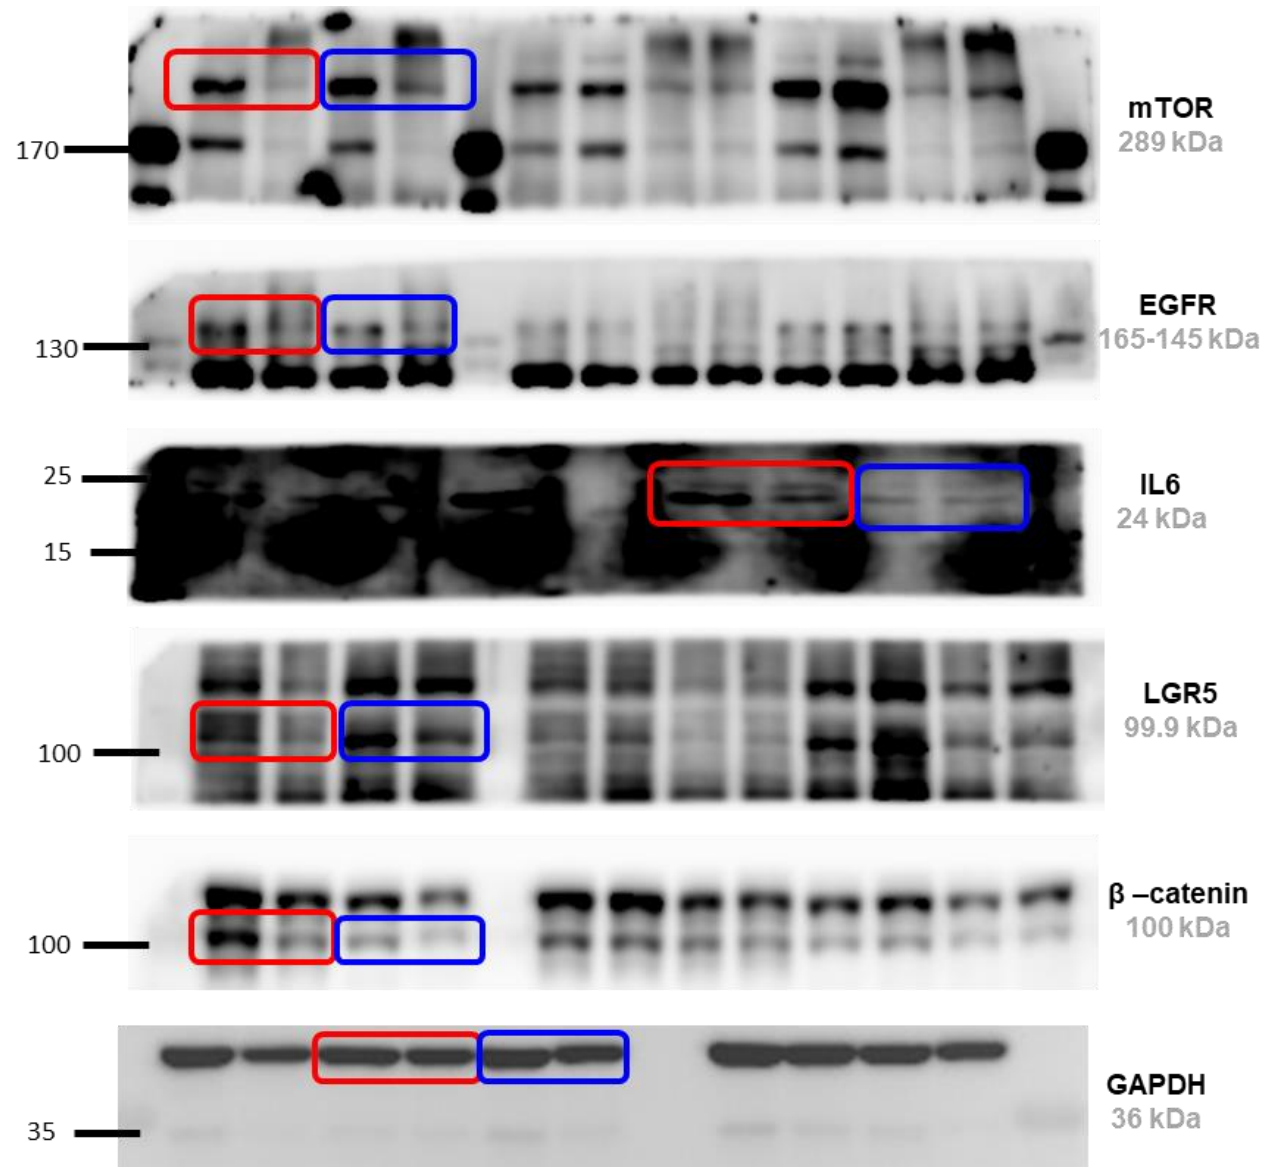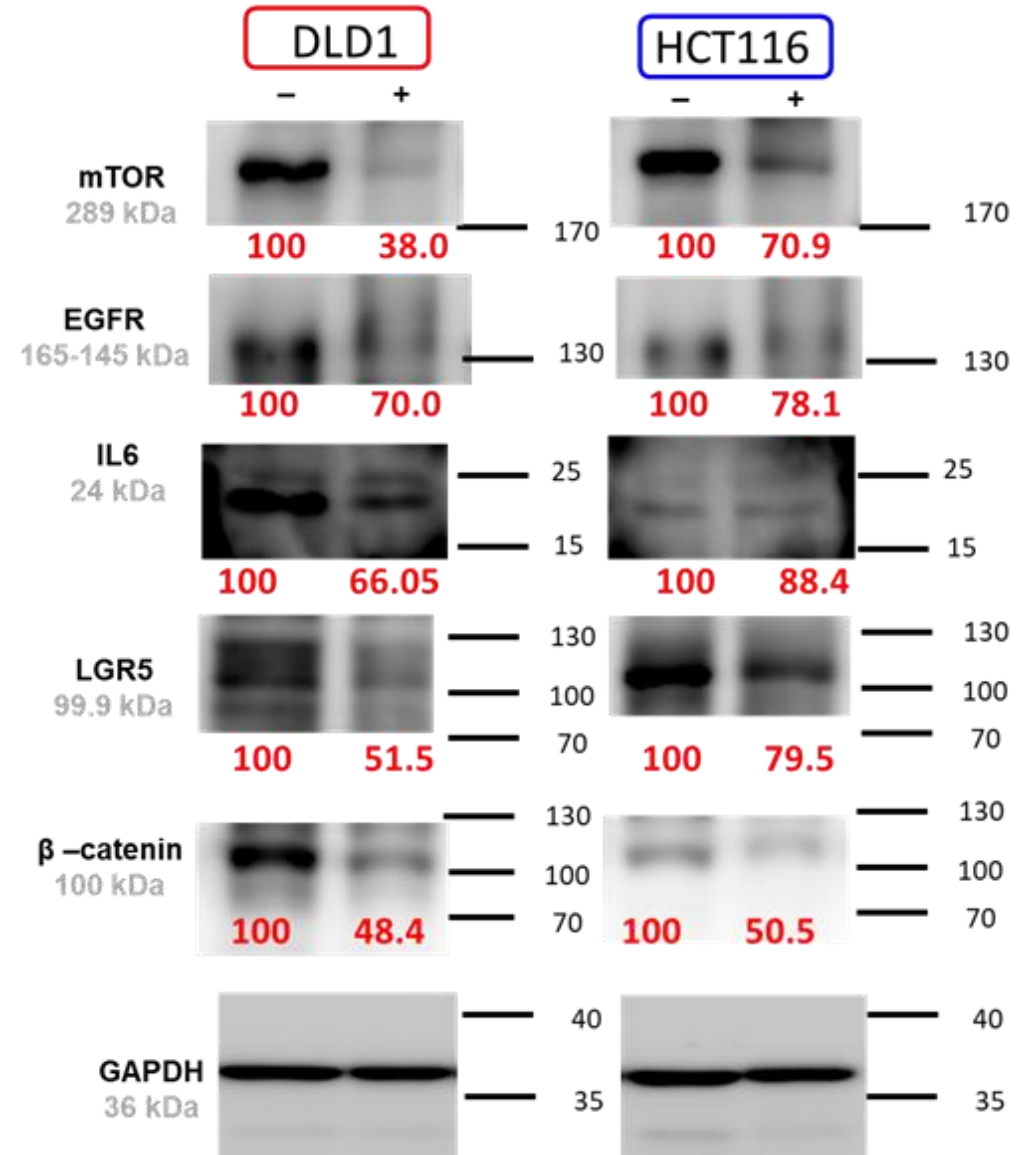

Figure S2 (3E) Raw WB data

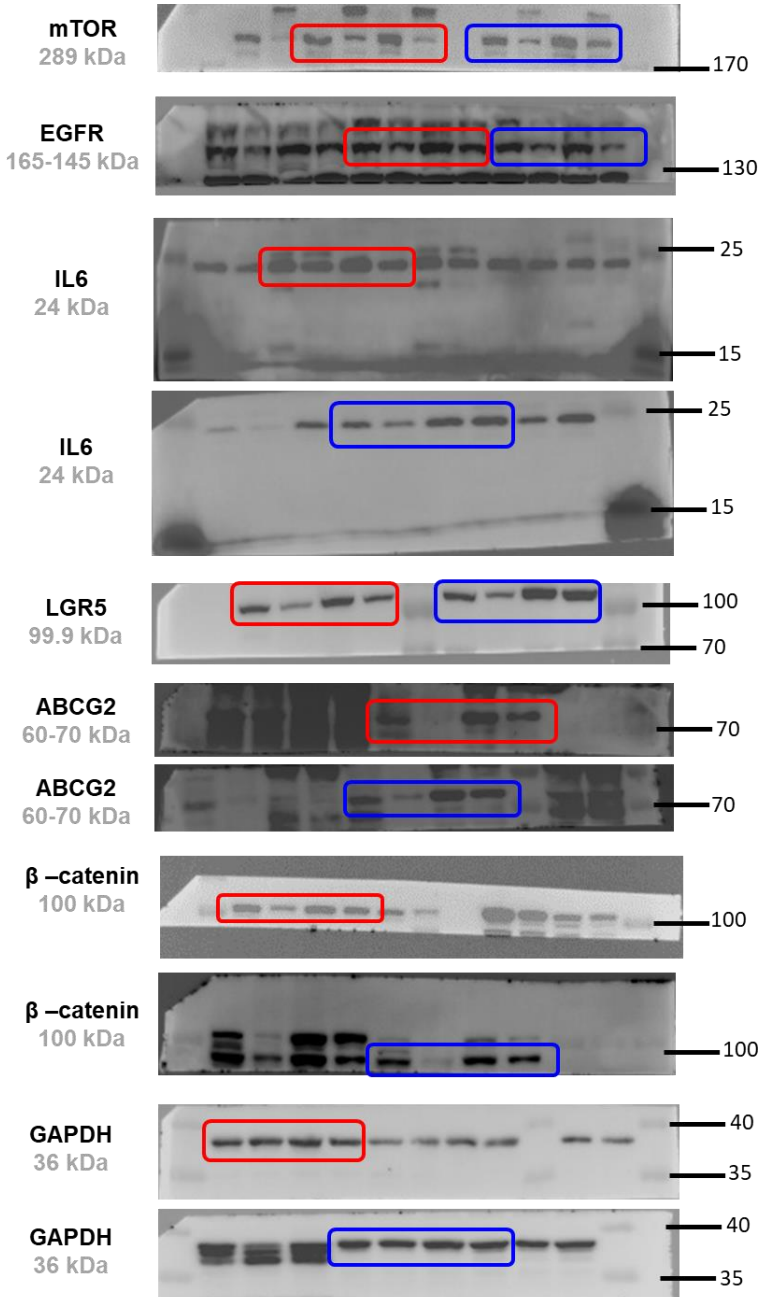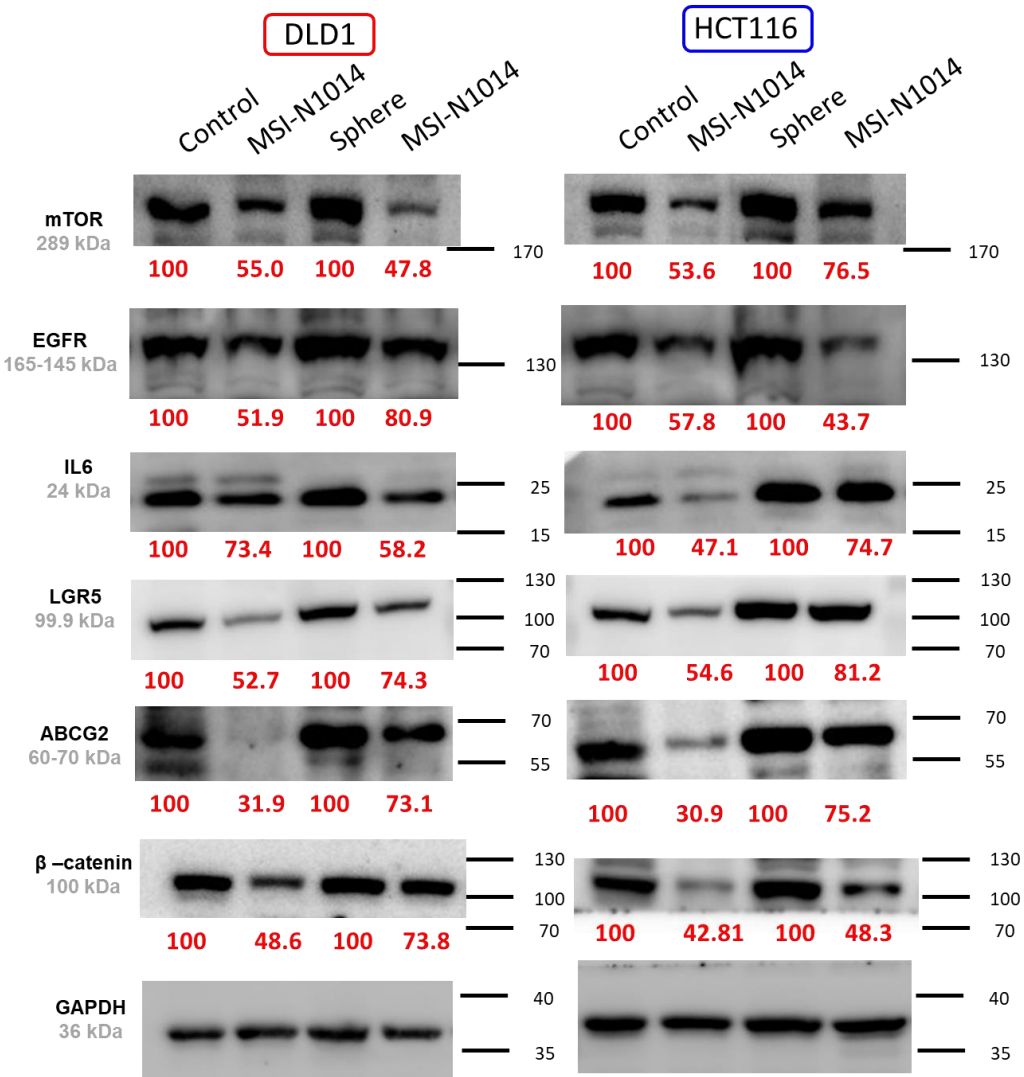

Figure S3 (4E) Raw WB data

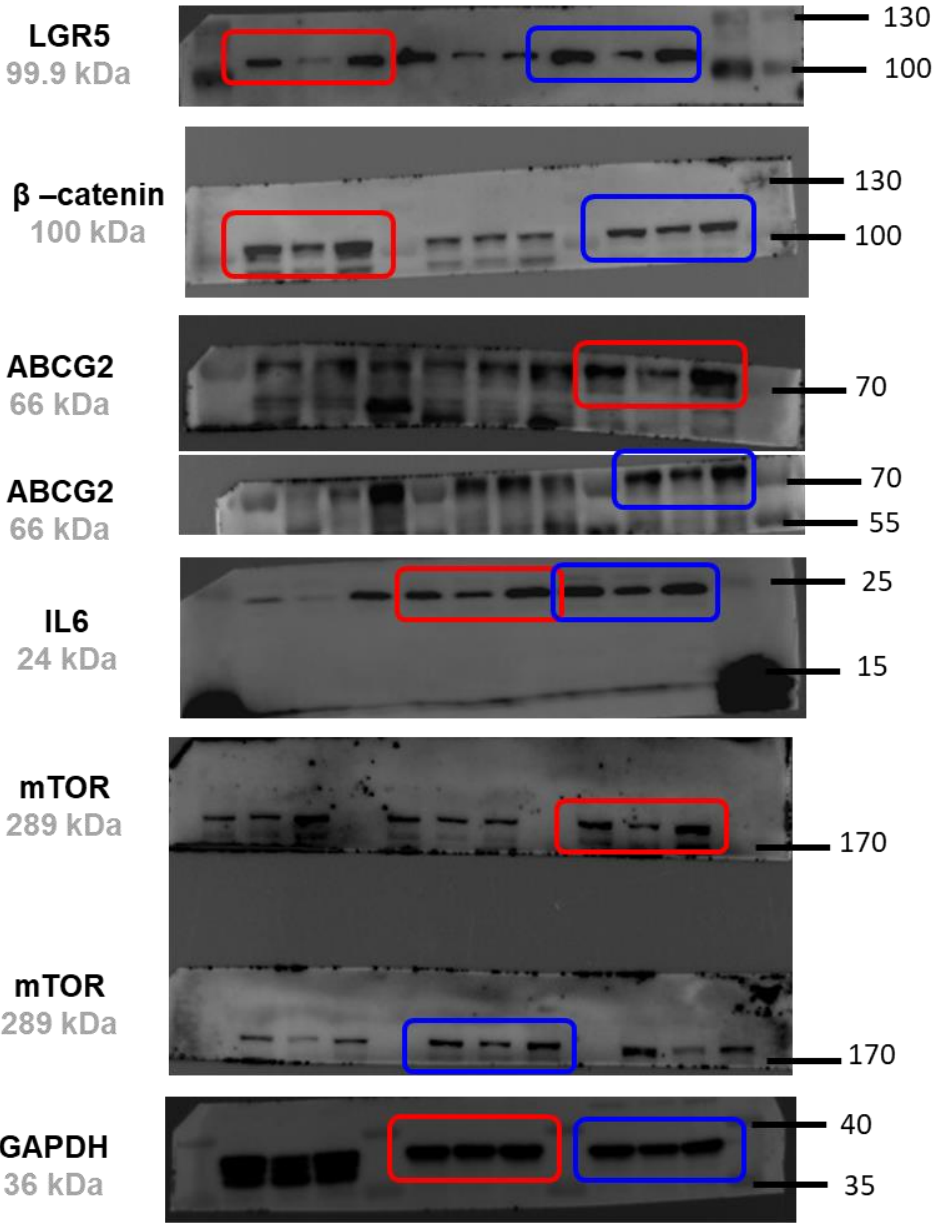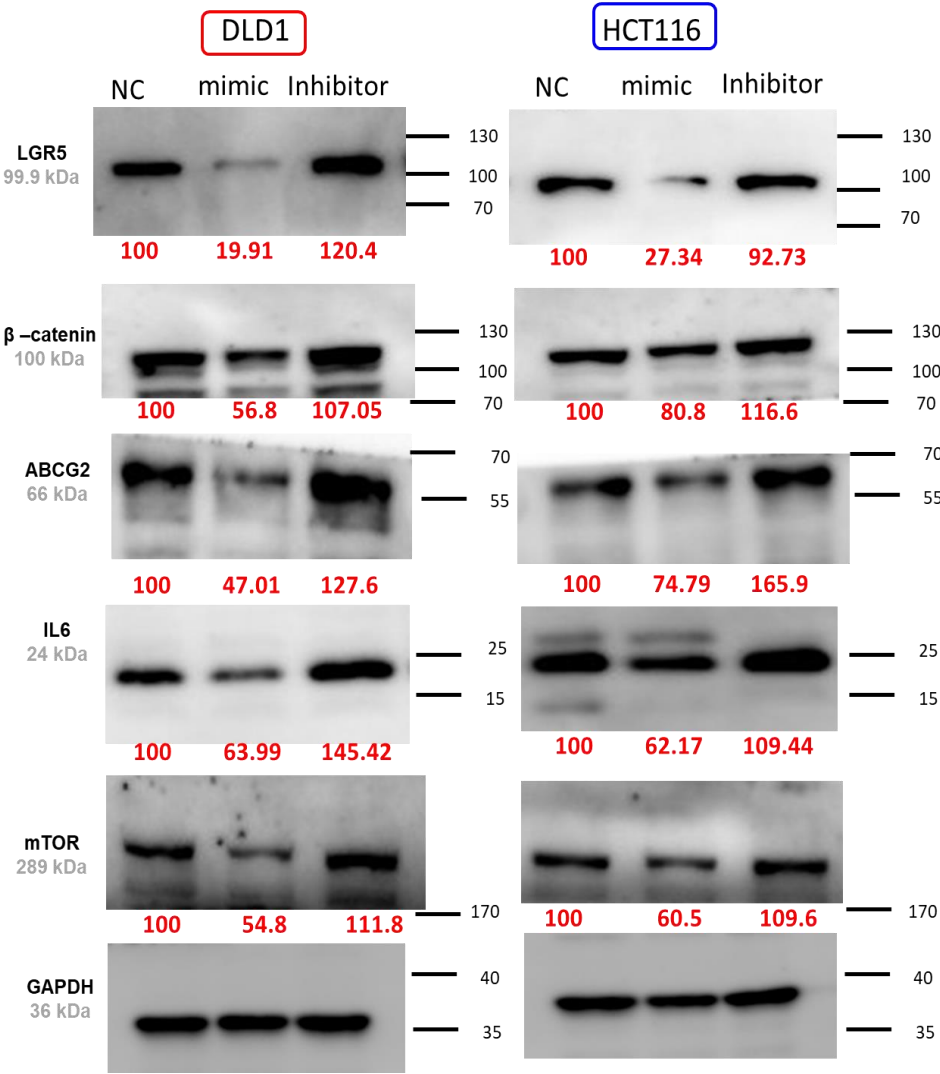

Figure S4 (5D) Raw WB data

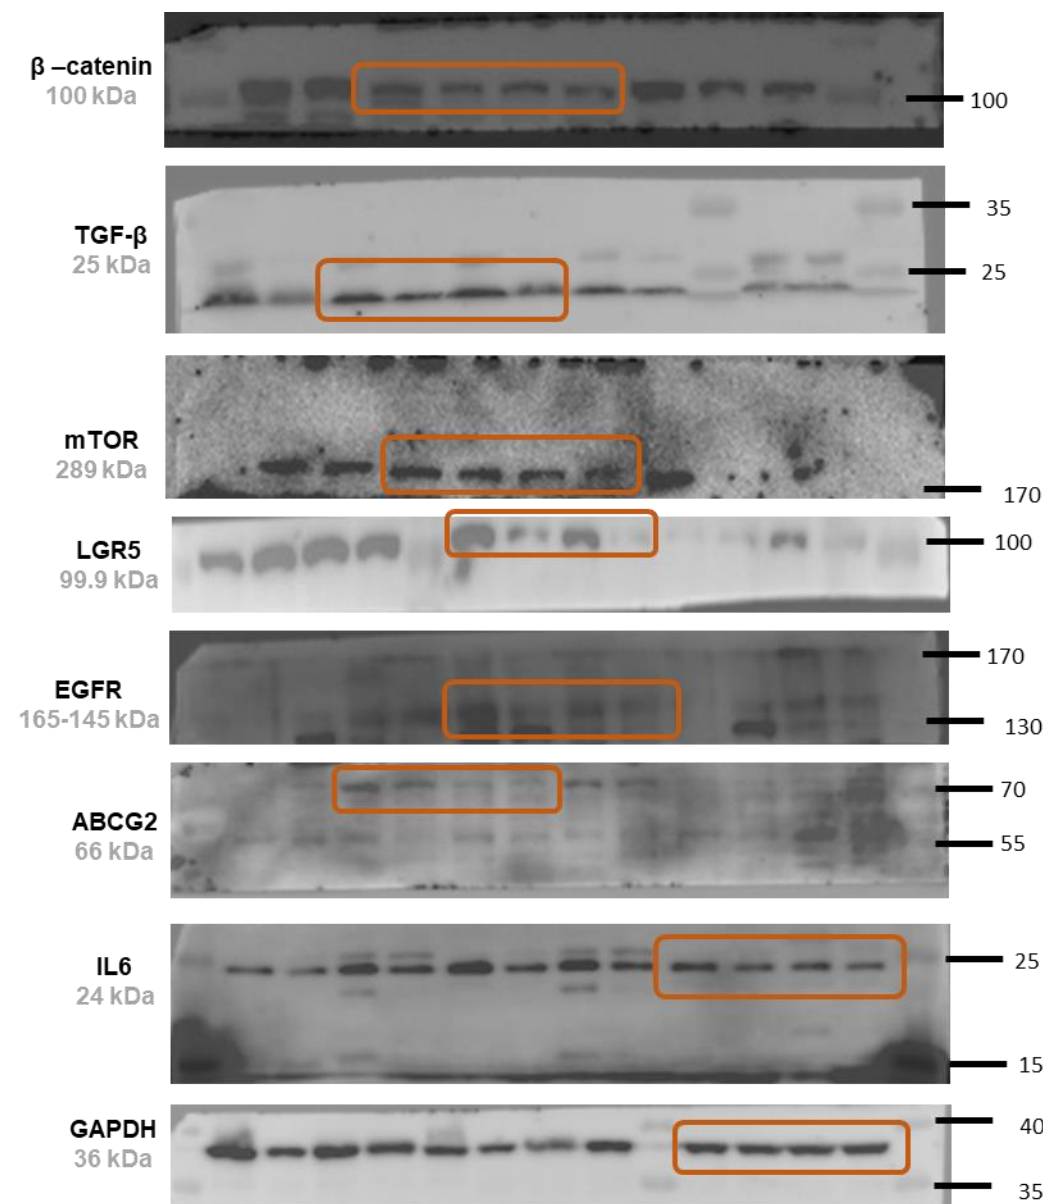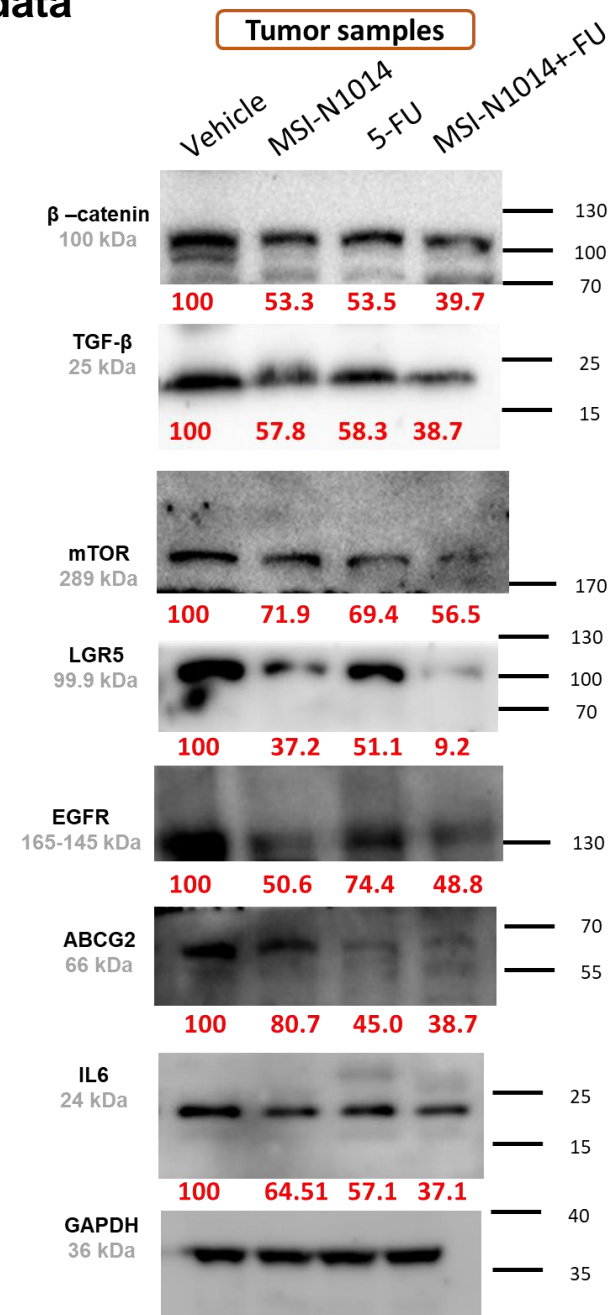

Supplement: s1 [file s1]
